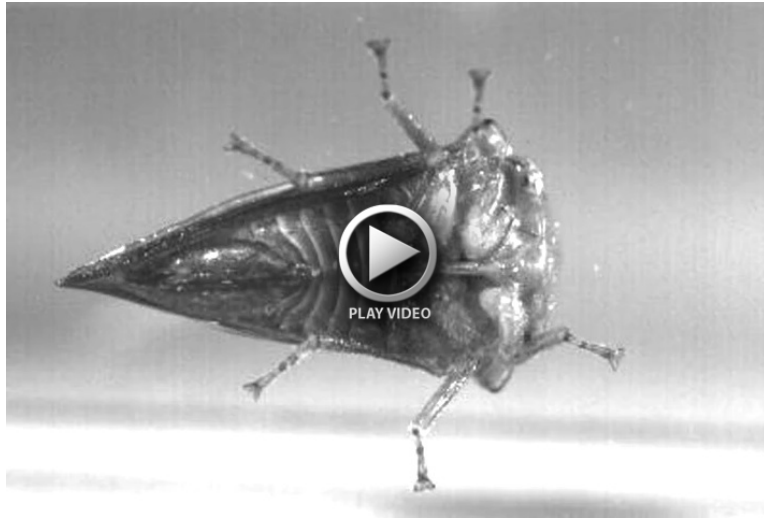

**Movie 1.** A jump by *Carynota marmorata* captured at 5000 frames  $s^{-1}$  and replayed at 10 frames  $s^{-1}$ . The insect is viewed from underneath as it jumps from the front glass wall of the experimental chamber. The hindlegs slip as they are extended rapidly. See Fig. 4.

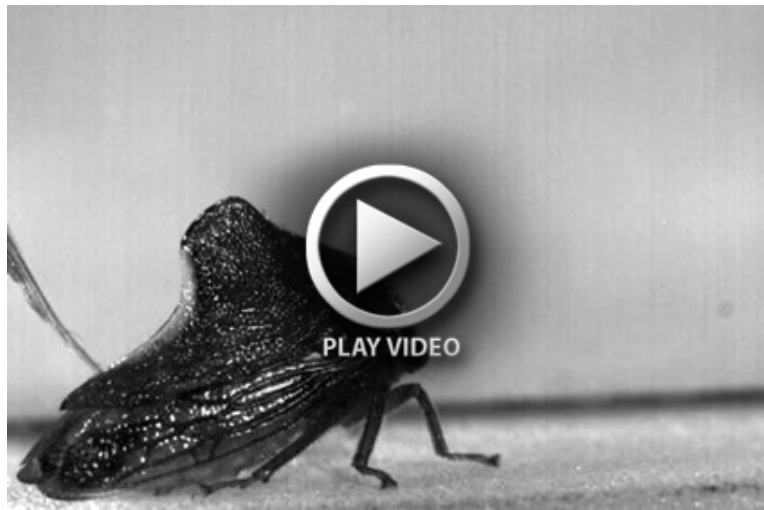

**Movie 2.** A side view of a jump by *Telamona compacta* captured at 5000 frames  $s^{-1}$  and replayed at 10 frames  $s^{-1}$ . See Fig. 6.

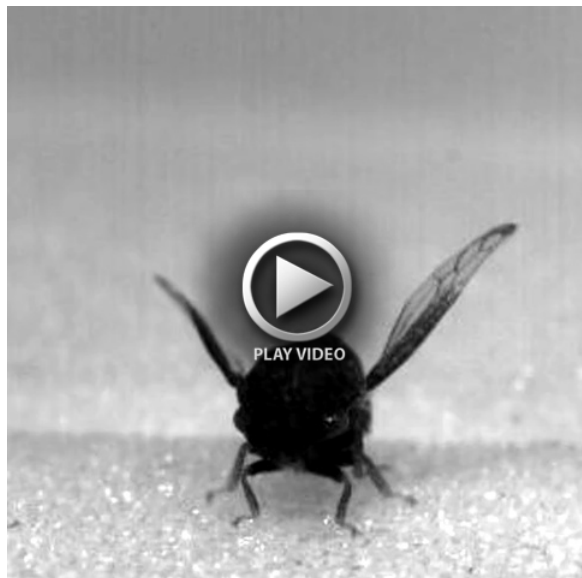

**Movie 3.** A head-on view of a jump by *Publilia concava* that is preceded by six cycles of wing flapping, but take-off is only achieved when the hindlegs propel a jump. Images were captured at 5000 frames  $s^{-1}$  and replayed at 10 frames  $s^{-1}$ . See Fig. 8.
